# Supplementary material
Source: PubMed Central journal article supplement (PMC2855359)
Supplement: kfq038_1.pdf [file kfq038_1.pdf]

**Table S1. Primers for the real-time RTPCR amplification of selected mRNAs from developmentally relevant genes**

| Sequence Name         | Sequence Notes                                             | Sequence                        | Tm   |
|-----------------------|------------------------------------------------------------|---------------------------------|------|
| ACC NM_007424 Forward | Aggrecan(Acan)                                             | TCC AGA ACC TTC GCT CCA ATG ACT | 60.1 |
| ACC NM_007424 Reverse |                                                            | ATC AAA GTC CAG GGT GTA GCG TGT | 60.3 |
| ACC NM_013467 Forward | Aldehyde dehydrogenase family 1, subfamily A1(Aldh1a1)     | GGG AAA GAG CCC TTG CAT TGT GTT | 60.2 |
| ACC NM_013467 Reverse |                                                            | GCG ACA CAA CAT TGG CCT TGA TGA | 60.3 |
| ACC NM_009656 Forward | Aldehyde dehydrogenase 2, mitochondrial(Aldh2)             | AAC AAG GAG GAC GTA GAC AAG GCA | 60.0 |
| ACC NM_009656 Reverse |                                                            | TGA GAT CCG CCA ATC GGT ACA ACA | 60.3 |
| ACC NM_011920 Forward | ATP-binding cassette, sub-family G(WHITE), member 2(Abcg2) | TTT GGA CTC AAG CAC AGC GAA TGC | 60.4 |
| ACC NM_011920 Reverse |                                                            | AGC CAG TAA GGT GAG GCT GTC AAA | 60.4 |
| ACC NM_009608 Forward | Actin,alpha,cardiac(Actc1)                                 | ACC ATG TAC CCT GGT ATT GCC GAT | 60.2 |
| ACC NM_009608 Reverse |                                                            | ATG GGC CTG CCT CAT CAT ACT CTT | 60.1 |
| ACC NM_019655 Forward | Adenosine deaminase, RNA-specific(Adar)                    | GCC AAA GCC AAA GAC AGT GGT CAA | 60.3 |
| ACC NM_019655 Reverse |                                                            | AAC TGG GCT CTT CCC AGA GAA CAA | 60.2 |
| ACC NM_009733 Forward | Axin 1 (Axin 1)                                            | AGA AAC ACA TGG TCA TGC CAA GCC | 60.2 |
| ACC NM_009733 Reverse |                                                            | TCC CAG ATT CAG CCT TCT TGG TGT | 60.3 |
| ACC NM_007541 Forward | Bone gamma carboxyglutamate otein 1(Bglap1)                | TCA TGT CCA AGC AGG AGG GCA ATA | 60.4 |
| ACC NM_007541 Reverse |                                                            | TGA TAG CTC GTC ACA AGC AGG GTT | 60.3 |
| ACC NM_009755 Forward | Bone morphogenetic otein 1 (Bmp1)                          | AAC CGC ATG TTC TTG CGC TTC TAC | 60.1 |
| ACC NM_009755 Reverse |                                                            | TAG TTG TTA TCG CCG AAC TGG GCA | 60.5 |
| ACC NM_009828 Forward | Cyclin A2 (Ccna2)                                          | TAC CTG CCT TCA CTC ATT GCT GGA | 60.2 |
| ACC NM_009828 Reverse |                                                            | ATT GAC TGT TGG GCA TGT TGT GGC | 60.6 |
| ACC NM_007631 Forward | Cyclin D1 (Ccmd1)                                          | GCT GCA AAT GGA ACT GCT TCT GGT | 60.4 |
| ACC NM_007631 Reverse |                                                            | TAC CAT GGA GGG TGG GTT GGA AAT | 60.3 |
| ACC NM_009829 Forward | Cyclin D2 (Ccmd2)                                          | ATC TGT GGG CTT CAG CAG GAT GAT | 60.4 |
| ACC NM_009829 Reverse |                                                            | TTC AGC AGC AGA GCT TCG ATT TGC | 60.2 |
| ACC NM_007633 Forward | Cyclin E1 (Ccne1)                                          | TGG ATT TGC TGG ACA AAG CCC AAG | 60.2 |
| ACC NM_007633 Reverse |                                                            | AGG CAA TGG CAG GTT TGG TCA TTC | 60.3 |
| ACC NM_007462 Forward | Adenomatosis polyposis coli(Apc)                           | TGC CTC TGA GTG CAT CAC TCT TGT | 60.3 |
| ACC NM_007462 Reverse |                                                            | AGC CTC TTA CTG CCC ATC GAA ACT | 60.2 |
| ACC NM_008554 Forward | Achaete-scute complex homolog 2 (Drosophila)(Ascl2)        | ACC TGC TTC TAG CCC AAG AAA CCT | 60.3 |
| ACC NM_008554 Reverse |                                                            | TGC AAG GTC CGG AAG ATG GAA GAT | 60.3 |
| ACC NM_007553 Forward | Bone morphogenetic otein 2 (Bmp2)                          | TGT GGG CCC TCA TAA AGA AGC AGA | 60.3 |
| ACC NM_007553 Reverse |                                                            | AGC AAG CTG ACA GGT CAG AGA ACA | 60.2 |

|                  |         |                                                       |                                 |      |
|------------------|---------|-------------------------------------------------------|---------------------------------|------|
| ACC NM_173404    | Forward | Bone morphogenetic protein 3 (Bmp3)                   | ACG CTG CAA TTT GAT GAG CAG ACC | 60.3 |
| ACC NM_173404    | Reverse |                                                       | TCC AGC CGA TAT CAG CAA AGT CCA | 60.2 |
| ACC NM_009771    | Forward | Beta-transducin repeat containing protein (Btrc)      | TCG AAT GCA CCA GAG ACC TCC AAT | 60.2 |
| ACC NM_009771    | Reverse |                                                       | GCC AGC AGC AAA GCT CAC CTT TAT | 60.2 |
| ACC NM_009844    | Forward | CD19 antigen (Cd19)                                   | ATT GTC TCC GAG GAA ACC TGA CCA | 59.9 |
| ACC NM_009844    | Reverse |                                                       | ATC CAC CAG TTC TCA ACA GCC AGA | 60.2 |
| ACC NM_013487    | Forward | CD3 antigen, delta polypeptide(Cd3d)                  | AAA CAC TCA ACT TGG GCA AAG GCG | 60.6 |
| ACC NM_013487    | Reverse |                                                       | TAG CTC CAC ACA GTT CTG GCA CAT | 60.3 |
| ACC NM_013488    | Forward | CD4 antigen (Cd4)                                     | GTT CGC CTT CGC AGT TTG ATC GTT | 60.2 |
| ACC NM_013488    | Reverse |                                                       | ACC CGG ACT GAA GGT CAC TTT GAA | 60.3 |
| ACC NM_009851    | Forward | CD44 antigen (Cd44)                                   | CCC AGT GGA AGC CAA ACC ATT CAA | 60.0 |
| ACC NM_009851    | Reverse |                                                       | TGA GCA CTG GTG CTG ATT CTG TCT | 60.3 |
| ACC NM_001081110 | Forward | CD8 antigen, alpha chain (Cd8a)                       | TCC TGG GAT CAC CAG CAT GCT TTA | 60.4 |
| ACC NM_001081110 | Reverse |                                                       | TTT GAC AGT CAG CGT CTT CCT CCA | 60.2 |
| ACC NM_009858    | Forward | CD8 antigen, beta chain 1 (Cd8b1)                     | AAA TGA TCA GCG CCC ACA ACA CTG | 60.3 |
| ACC NM_009858    | Reverse |                                                       | AGA GCT TGC AGC AGT TCA AAG CAG | 60.2 |
| ACC NM_007659    | Forward | Cell division cycle 2 homolog A (S.pombe) (Cdc2a)     | TTT CCA CGG CGA CTC AGA GAT TGA | 60.2 |
| ACC NM_007659    | Reverse |                                                       | TCT GGC CAC ACT TCG TTG TTA GGA | 60.2 |
| ACC NM_009861    | Forward | Cell division cycle 42 homolog (S.cerevisiae) (Cdc42) | TGC CCT CAC ACA GAA AGG CCT AAA | 60.6 |
| ACC NM_009861    | Reverse |                                                       | TCT GGA GAT GCG TTC ATA GCA GCA | 60.3 |
| ACC NM_009864    | Forward | Cadherin 1 (Cdh1)                                     | TGA CTC GAA ATG ATG TGG CTC CCA | 60.4 |
| ACC NM_009864    | Reverse |                                                       | ACT GCC CTC GTA ATC GAA CAC CAA | 60.4 |
| ACC NM_007664    | Forward | Cadherin 2 (Cdh2)                                     | AGA CCT GAG TTT CTG CAC CAG GTT | 60.3 |
| ACC NM_007664    | Reverse |                                                       | GGG CAT TTG GAT CAT CCG CAT CAA | 60.2 |
| ACC NM_007742    | Forward | Collagen, type I , alpha 1(Col1a1)                    | TGG TTT GGA GAG AGC ATG ACC GAT | 60.2 |
| ACC NM_007742    | Reverse |                                                       | TAG GCT ACG CTG TTC TTG CAG TGA | 60.2 |
| ACC NM_031163    | Forward | Collagen, type II , alpha 1(Col2a1)                   | ACA TAG GGC CTG TCT GCT TCT TGT | 60.3 |
| ACC NM_031163    | Reverse |                                                       | TGA CTG CGG TTG GAA AGT GTT TGG | 60.2 |
| ACC NM_007740    | Forward | Collagen, type IX , alpha 1(Col9a1)                   | AGA TTG ATG CGG ATG GCT TTG CAG | 60.2 |
| ACC NM_007740    | Reverse |                                                       | TGG CAG CTC ATG ACA GGT TTC TCT | 60.4 |
| ACC NM_009818    | Forward | Catenin(cadherin associated protein),alpha 1(Ctnna1)  | AGC GCT GTG TCC TCA GGT TAT CAA | 60.3 |
| ACC NM_009818    | Reverse |                                                       | ACA GCA TCT GTG AGA ACA CGG ACT | 60.2 |
| ACC NM_021704    | Forward | Chemokine(C-X-C motif) ligand 12 (Cxcl12)             | TGA GTC AAC ACA AGA TCC GGC AGA | 60.2 |
| ACC NM_021704    | Reverse |                                                       | AGC ACA GCT TCA GGG ATC ACT TCT | 60.2 |

|               |         |                                                                     |                                 |      |
|---------------|---------|---------------------------------------------------------------------|---------------------------------|------|
| ACC NM_007857 | Forward | Desert hedgehog (Dhh)                                               | ACC ACC TTC ACT CAC CTC CAA AGA | 59.9 |
| ACC NM_007857 | Reverse |                                                                     | AGA GGG TTT GGA AGA TCG TGC TGA | 60.1 |
| ACC NM_007865 | Forward | Delta-like 1(Drosophila) (Dll1)                                     | ACG GAG AAG GTT GCT CTG TGT TCT | 60.2 |
| ACC NM_007865 | Reverse |                                                                     | TCA TCA CAC CCT GGC AGA CAG ATT | 60.2 |
| ACC NM_007866 | Forward | Delta-like 3(Drosophila) (Dll3)                                     | AGT TCG TCG GCT GAC TGG AAT CAT | 60.3 |
| ACC NM_007866 | Reverse |                                                                     | AGG ATC AGG CCT CTC GTG CAT AAA | 60.0 |
| ACC NM_008052 | Forward | Deltex 1 homolog (Drosophila) (Dtx1)                                | TAC CCA ACA ATG AGA AGG GCC GAA | 60.4 |
| ACC NM_008052 | Reverse |                                                                     | ACT CCG TCT TGT GGT GAA TCT CGT | 59.9 |
| ACC NM_023742 | Forward | Deltex 2 homolog (Drosophila) (Dtx2)                                | GGC CAT GTA TTG CAA CGG GAA CAA | 60.4 |
| ACC NM_023742 | Reverse |                                                                     | TGG GAG GGA CAT TTG GAA CCT GAA | 60.3 |
| ACC NM_010091 | Forward | Dishevelled, dsh homolog 1(Drosophila) (Dvl1)                       | TCT CAA CAT GGA GAG GCA CCA CTT | 60.2 |
| ACC NM_010091 | Reverse |                                                                     | TTG ACA TCG TTC ACC TGC AGC AAC | 60.1 |
| ACC NM_177821 | Forward | E1A binding otein p300 (Ep300)                                      | TTG GCT CAG TCT GGG TCA CTC AAT | 60.2 |
| ACC NM_177821 | Reverse |                                                                     | TGG ATG GAG CCA AAG GCA TGT TTG | 60.3 |
| ACC NM_010197 | Forward | Fibroblast growth factor 1 (Fgf1)                                   | TGA AGG TTG CTC AGA CTT CAC CCT | 60.1 |
| ACC NM_010197 | Reverse |                                                                     | GGT GCC TTG AAA CCA TGC TTC ACT | 60.2 |
| ACC NM_008006 | Forward | Fibroblast growth factor 2 (Fgf2)                                   | AAG AGC GAC CCA CAC GTC AAA CTA | 60.3 |
| ACC NM_008006 | Reverse |                                                                     | TTC ATA GCA AGG TAC CGG TTG GCA | 60.6 |
| ACC NM_008007 | Forward | Fibroblast growth factor 3 (Fgf3)                                   | TGC TTC GGA TCA CTA CAA CGC AGA | 60.3 |
| ACC NM_008007 | Reverse |                                                                     | ATT CAC CGA CAC GTA CCA AGG TCT | 60.0 |
| ACC NM_010202 | Forward | Fibroblast growth factor 4 (Fgf4)                                   | TGC CCT GTT CTG ATG GGA TTC TCT | 59.9 |
| ACC NM_010202 | Reverse |                                                                     | AAG GGA GCT AGC TGG CTG AAG AAA | 60.3 |
| ACC NM_010206 | Forward | Fibroblast growth factor receptor 1 (Fgfr1)                         | AAA CCC AAC CGT GTG ACC AAA GTG | 60.2 |
| ACC NM_010206 | Reverse |                                                                     | TTG GAG GCG TAC TCC ACA ATG ACA | 60.3 |
| ACC NM_010446 | Forward | Forkhead box A2 (Foxa2)                                             | AAG TAT GCT GGG AGC CGT GAA GAT | 60.3 |
| ACC NM_010446 | Reverse |                                                                     | CGC GGA CAT GCT CAT GTA TGT GTT | 59.8 |
| ACC NM_008043 | Forward | Frequently rearranged in advanced T-cell lymphomas(Frat1)           | TGG GTA ATG GAA GGG TAT GGC GAA | 60.2 |
| ACC NM_008043 | Reverse |                                                                     | ACA CCC AGG AAA CAG TGA CCT TGA | 60.3 |
| ACC NM_021457 | Forward | Frizzled homolog 1 (Drosophila) (Fzd1)                              | AAC CGA CCG ATA GCG AAC TTT GGA | 60.4 |
| ACC NM_021457 | Reverse |                                                                     | TGA TGA CCA GAC CCA GAG CAA GTT | 60.2 |
| ACC NM_020004 | Forward | GCN5 general control of amino acid synthesis-like 2 (yeast)(Gcn5l2) | TGG TCA ATG AGG TCA TGC TGA CGA | 60.3 |
| ACC NM_020004 | Reverse |                                                                     | ACT CGA TGA TTC CTC GCC GTT CTT | 60.2 |
| ACC NM_019506 | Forward | Growth differentiation factor 2 (Gdf2)                              | TGC ACC CAA GGA ATA TGA CGC CTA | 60.3 |
| ACC NM_019506 | Reverse |                                                                     | CAT GTT TGG TGG GTG TCA CGT CAT | 59.8 |

|               |         |                                                 |                                 |      |
|---------------|---------|-------------------------------------------------|---------------------------------|------|
| ACC NM_008108 | Forward | Growth differentiation factor 3 (Gdf3)          | TTA TGC TAC GTG AAG GAG CTG GGT | 59.9 |
| ACC NM_008108 | Reverse |                                                 | AGA CAG GAG CCA TCT TGG AAA GGT | 60.1 |
| ACC NM_010288 | Forward | Gap junction protein, alpha 1(Gja1)             | TAC TTC AAT GGC TGC TCC TCA CCA | 60.2 |
| ACC NM_010288 | Reverse |                                                 | GCT CGC TGG CTT GCT TGT TGT AAT | 60.4 |
| ACC NM_008124 | Forward | Gap junction protein, beta 1(Gjb1)              | ACT CCA TCA AAC CTT CCC TCC CTT | 60.0 |
| ACC NM_008124 | Reverse |                                                 | GGC AGA AAG AAT TGC CCA CAC CAT | 60.3 |
| ACC NM_008228 | Forward | Histone deacetylase 1 (Hdac1)                   | ATT CCT GCG TTC TAT TCG CCC AGA | 60.4 |
| ACC NM_008228 | Reverse |                                                 | AAC AAG CCA TCA AAC ACC GGA CAG | 60.0 |
| ACC NM_008229 | Forward | Histone deacetylase 2 (Hdac2)                   | TAC AAC AGA TCG CGT GAT GAC CGT | 60.3 |
| ACC NM_008229 | Reverse |                                                 | TCC CTT TCC AGC ACC AAT ATC CCT | 60.1 |
| ACC NM_010481 | Forward | Heat shock protein 9 (Hspa9)                    | GAA GCA ATC AAG GGT GCA GTG GTT | 60.2 |
| ACC NM_010481 | Reverse |                                                 | GAC CTT TGC TTG TTT GCC CTC CAT | 60.2 |
| ACC NM_010512 | Forward | Insulin-like growth factor 1 (Igf1)             | TGG TGG ATG CTC TTC AGT TCG TGT | 60.4 |
| ACC NM_010512 | Reverse |                                                 | TCA TCC ACA ATG CCT GTC TGA GGT | 60.2 |
| ACC NM_008814 | Forward | Pancreatic and duodenal homeobox 1(Pdx1)        | ACC TAG GCG TCG CAC AAG AAG AAA | 60.6 |
| ACC NM_008814 | Reverse |                                                 | GGC ATC AGA AGC AGC CTC AAA GTT | 60.0 |
| ACC NM_021459 | Forward | ISL1 transcription factor,LIM/homedomain (Isl1) | GCA AGG ACA AGA AAC GCA GCA TCA | 60.4 |
| ACC NM_021459 | Reverse |                                                 | ACT GGG TTA GCC TGT AAA CCA CCA | 60.2 |
| ACC NM_013822 | Forward | Jagged 1 (Jag1)                                 | ACT GGC ACT GGT AGT TTC TGT GGT | 60.3 |
| ACC NM_013822 | Reverse |                                                 | ATG GAC ACC AGG GCA CAT TCA CTA | 60.3 |
| ACC NM_008469 | Forward | Keratin 15 (Krt15)                              | TCA ATG TGG AAA TGG ACG CAG CAC | 60.3 |
| ACC NM_008469 | Reverse |                                                 | TGT TAG ACG CCA CCT CCT TGT TCA | 60.2 |
| ACC NM_008604 | Forward | Membrane metallo endopeptidase (Mme)            | ATT GAT AGC AGA GGC GGA CAA CCT | 60.3 |
| ACC NM_008604 | Reverse |                                                 | TCT CAG CTG TCC AAG AAG TGC CAT | 60.4 |
| ACC NM_010835 | Forward | Homeobox, msh-like 1 (Msx1)                     | TCC TGG TTG TCG CTT CCT AAA CCT | 60.1 |
| ACC NM_010835 | Reverse |                                                 | TCT TGG CCT CTG CAC CCT TAG TTT | 60.5 |
| ACC NM_010849 | Forward | Myelocytomatosis oncogene (Myc)                 | ATT TCC TTT GGG CGT TGG AAA CCC | 60.5 |
| ACC NM_010849 | Reverse |                                                 | TCG TCG CAG ATG AAA TAG GGC TGT | 60.3 |
| ACC NM_010866 | Forward | Myogenic differentiation 1 (Myod1)              | CAG GCA TGC TGT GTA GTG CAA CAA | 60.2 |
| ACC NM_010866 | Reverse |                                                 | TTA TTT CCA ACA CCT GAG CGA GCG | 59.5 |
| ACC NM_026370 | Forward | MYST histone acetyltransferase 1 (Myst1)        | AAG CTA CTG GTC ATG GGT CTT GCT | 60.3 |
| ACC NM_026370 | Reverse |                                                 | TGT CAT TCT GGG TGA TGC TGG TCA | 60.4 |
| ACC NM_177619 | Forward | MYST histone acetyltransferase 2 (Myst2)        | TCC AAA CAT GGT TGC CAC CAA AGG | 60.4 |
| ACC NM_177619 | Reverse |                                                 | TGA GTG ACT GCG AGA TGA AAC CCA | 60.2 |

|               |         |                                                                      |                                 |      |
|---------------|---------|----------------------------------------------------------------------|---------------------------------|------|
| ACC NM_010875 | Forward | Neural cell adhesion molecule 1 (Ncam1)                              | AGC AGT GAA CCG TAT TGG ACA GGA | 60.1 |
| ACC NM_010875 | Reverse |                                                                      | TAT GGT TCC ACC CGG TCA ATG GAT | 60.2 |
| ACC NM_009718 | Forward | Neurogenin 2 (Neurog2)                                               | TGT AAG GGT TGA ATG CAA GCG TGG | 60.1 |
| ACC NM_009718 | Reverse |                                                                      | ATG CAT GAA GCA ATC CTC CCT CCT | 60.5 |
| ACC NM_008714 | Forward | Notch gene homolog 1(Drosophila) (Notch1)                            | TCT GCT TAT GCC TCA AGG GAA CCA | 60.3 |
| ACC NM_008714 | Reverse |                                                                      | AAT CTT GTC CAG ACA GGT GCC AGA | 60.2 |
| ACC NM_010928 | Forward | Notch gene homolog 2(Drosophila) (Notch2)                            | TCA ATG AGT GCA GCT CTA ACC CGT | 60.3 |
| ACC NM_010928 | Reverse |                                                                      | AGG TTC ACC AGG GTC TGA CAG TTT | 60.1 |
| ACC NM_010949 | Forward | Numb gene homolog (Drosophila) (Numb)                                | ACT CGG CGA TGG ATC TGT CAT TGT | 60.3 |
| ACC NM_010949 | Reverse |                                                                      | TTC TCC CGC TTC TGT TTA CGC TCT | 60.2 |
| ACC NM_011014 | Forward | Opioid receptor, sigma 1 (O s1)                                      | AGG AGC TGC AGT GGG TAT TTG TGA | 60.4 |
| ACC NM_011014 | Reverse |                                                                      | AAG GTG CCA GAG ATG ATG GTG TCA | 60.2 |
| ACC NM_019695 | Forward | Par-6 (partitioning defective 6,) homolog alpha (C.elegans) (Pard6a) | AGA TTT CCG CCA GGT GTC TTC AGT | 60.3 |
| ACC NM_019695 | Reverse |                                                                      | TGC CAT CTC GAA TGT AGA AGC CCA | 60.2 |
| ACC NM_011145 | Forward | Peroxisome oliferator activator receptor delta (Ppard)               | GCC CAA GTT CGA GTT TGC TGT CAA | 60.1 |
| ACC NM_011145 | Reverse |                                                                      | ATT CTA GAG CCC GCA GAA TGG TGT | 60.3 |
| ACC NM_009115 | Forward | S100 otein, beta polypeptide, neural (S100b)                         | TGC CCT CAT TGA TGT CTT CCA CCA | 60.5 |
| ACC NM_009115 | Reverse |                                                                      | TCC ACC ACT TCC TGC TCC TTG ATT | 60.3 |
| ACC NM_009233 | Forward | SRY-box containing gene 1(Sox1)                                      | TCA AGG AAG CAA TCC TGA CCC AGA | 60.0 |
| ACC NM_009233 | Reverse |                                                                      | GTG TGT GTG TGT GTG TGT GTG TGT | 60.1 |
| ACC NM_009029 | Forward | Retinoblastoma 1 (Rb1)                                               | GGA ATC CCT TGC ATG GCT TTC AGA | 59.7 |
| ACC NM_009029 | Reverse |                                                                      | TGA GAG GAC AAG CAG GTT CAA GGT | 60.1 |
| ACC NM_011146 | Forward | Peroxisome oliferator activator receptor gamma (Pparg)               | AGG GCG ATC TTG ACA GGA AAG ACA | 60.1 |
| ACC NM_011146 | Reverse |                                                                      | AAA TTC GGA TGG CCA CCT CTT TGC | 60.3 |
| ACC NM_011443 | Forward | SRY-box containing gene 2(Sox2)                                      | AAA GGA GAG AAG TTT GGA GCC CGA | 60.2 |
| ACC NM_011443 | Reverse |                                                                      | GGG CGA AGT GCA ATT GGG ATG AAA | 60.4 |
| ACC NM_009309 | Forward | Brachyury(T)                                                         | TGC TGC AGT CCC ATG ATA ACT GGT | 60.5 |
| ACC NM_009309 | Reverse |                                                                      | ACC ATT GCT CAC AGA CCA GAG ACT | 59.9 |
| ACC NM_009354 | Forward | Telomerase reverse transcriptase (Tert)                              | TTT GGT TGC CCA ATG CCT AGT GTG | 60.2 |
| ACC NM_009354 | Reverse |                                                                      | ATG ACA CCT GGT GGA AGG AAA GGT | 60.3 |
| ACC NM_023279 | Forward | Tubulin, beta 3 (Tubb3)                                              | TTC TGG TGG ACT TGG AAC CTG GAA | 60.2 |
| ACC NM_023279 | Reverse |                                                                      | TCA CAC TCT TTC CGC ACG ACA TCT | 60.3 |
| ACC NM_021279 | Forward | Wingless-related MMTV integration site 1 (Wnt1)                      | AGC TAA GTG GGA AAG GAG GTT GCT | 60.3 |
| ACC NM_021279 | Reverse |                                                                      | TGG TTC ACA GCT GTT CAA TGG CTC | 59.9 |

|               |         |                                                                    |                                 |      |
|---------------|---------|--------------------------------------------------------------------|---------------------------------|------|
| ACC NM_010368 | Forward | Glucuronidase, beta (Gusb)                                         | TTG CCA TCA ACA ACA CAC TGA CCC | 60.1 |
| ACC NM_010368 | Reverse |                                                                    | ATC GAT GCA GTC CCG CAT AGT TGA | 60.3 |
| ACC NM_013556 | Forward | Hypoxanthine guanine phosphoribosyl transferase 1(H t1)            | ATT AGC AGG TGT TCT AGT CCT GTG | 60.2 |
| ACC NM_013556 | Reverse |                                                                    | GC                              | 59.4 |
| ACC NM_008302 | Forward | Heat shock otein 90kDa alpha(cytosolic), class B member1(Hsp90ab1) | GGG ACG CAG CAA CTG ACA TTT CTA | 60.2 |
| ACC NM_008302 | Reverse |                                                                    | TTT CAG GCA GAA ATT GCC CAG CTC | 60.1 |
| ACC NM_008084 | Forward | Glyceraldehyde-3-phosphate dehydrogenase(Gapdh)                    | TCA GCT CTT TCC CAC TGT CCA ACT | 60.3 |
| ACC NM_008084 | Reverse |                                                                    | TCA ACA GCA ACT CCC ACT CTT CCA | 60.3 |
| ACC NM_007393 | Forward | Actin, beta, cytoplasmic (Actb)                                    | ACC CTG TTG CTG TAG CCG TAT TCA | 60.2 |
| ACC NM_007393 | Reverse |                                                                    | TCT TGG GTA TGG AAT CCT GTG GCA | 60.2 |
| ACC NM_013633 | Forward | Oct-4 Pou5f1. Pou domain class 5 transcription factor              | TCT CCT TCT GCA TCC TGT CAG CAA | 58.5 |
| ACC NM_013633 | Reverse |                                                                    | GGC GTT CTC TTT GGA AAG GTG TTC | 53.9 |
| ACC NM_028016 | Forward | Nanog homeobox                                                     | CTC GAA CCA CAT CCT TCT CT      | 59.9 |
| ACC NM_028016 | Reverse |                                                                    | AGG GTC TGC TAC TGA GAT GCT CTG | 61.0 |
| ACC NM_010856 | Forward | $\alpha$ -Myosin heavy chain, cardiac muscle                       | CAA CCA CTG GTT TTT CTG CCA CCG | 57.0 |
| ACC NM_010856 | Reverse |                                                                    | CTG CTG GAG AGG TTA TTC CTC G   | 64.1 |
| ACC NM_080728 | Forward | $\beta$ -Myosin heavy chain, cardiac muscle                        | GGA AGA GTG AGC GGC GCA TCA     | 65.4 |
| ACC NM_080728 | Reverse |                                                                    | AGG                             | 60.6 |
| ACC NM_008700 | Forward | Nkx 2.5; NK2 transcription factor related locus 5                  | TGC AAA GGC TCC AGG TCT GAG GGC | 65.6 |
| ACC NM_008700 | Reverse |                                                                    | GCC AAC ACC AAC CTG TCC AAG TTC | 59.9 |
| ACC NM_008700 | Forward |                                                                    | CGA CGG AAG CCA CGC GTG CT      |      |
| ACC NM_008700 | Reverse |                                                                    | CCG CTG TCG CTT GCA CTT G       |      |
