# Supplementary material
Source: PubMed Central journal article supplement (PMC2855359)
Supplement: kfq038_2.pdf [file kfq038_2.pdf]

| <b>Table S2. Primers for real-time RTPCR amplification of selected homeobox gene mRNAs</b> |                         |                         |                          |                 |
|--------------------------------------------------------------------------------------------|-------------------------|-------------------------|--------------------------|-----------------|
| <b>Homeobox gene</b>                                                                       | <b>Accession number</b> | <b>Forward primer</b>   | <b>Reverse primer</b>    | <b>Boundary</b> |
| <b>Anatomical Structure Morphogenesis</b>                                                  |                         |                         |                          |                 |
| En1                                                                                        | NM_010133               | GTCTACTGCACACGCTATTC    | CTCCGCCTTGAGTCTCT        | Exon 1-2        |
| Hoxc10                                                                                     | NM_010462               | GTCCAGACACCTCGGAT       | TCTCCAATTCCAGCGTCT       | Exon 1-2        |
| Hoxc13                                                                                     | NM_010464               | GGTGTACTGCTCCAAGGA      | TCAGCTGCACCTTGGTAT       | Exon 1-2        |
| Hoxd3                                                                                      | NM_010468               | CTTCCCCTGGATGAAAGAATC   | AGCTGAGCACTCGTGTA        | Exon 2-3        |
| Lbx1                                                                                       | NM_010691               | TCGCCAGCAAGACCTTTA      | CGTGATTTTCGCCGTTTC       | Exon 1-2        |
| Pitx1                                                                                      | NM_011097               | AGCCGCTGGAGAACTC        | TTCTTAGCTGGGTCTCTG       | Exon 1-2        |
| Pou5f1                                                                                     | NM_013633               | GCAGAAGGAGCTAGAACAGT    | TCGAAGCGACAGATGGT        | Exon 2-3        |
| Six2                                                                                       | NM_011380               | GCAAGTCAGCAACTGGTT      | CTTGCCACTGCCATTGA        | Exon 1-2        |
| Six4.                                                                                      | NM_011382               | AGGTCAGCAACTGGTTCA      | ATCCTCATGTCCCTTGCT       | Exon 1-2        |
| <b>Organ Morphogenesis</b>                                                                 |                         |                         |                          |                 |
| Cdx1,                                                                                      | NM_009880               | AGTTTCACTACAGCCGGT      | TTTACTTTGCGCTCCTTGG      | Exon 2-3        |
| Cdx2,                                                                                      | NM_007673               | AACCTGTGCGAGTGGAT       | TGAAACTCCTTCTCCAGCTC     | Exon 1-2        |
| Lhx1                                                                                       | NM_008498               | GAGGATTACCTGAGTAACAGC   | GAGACGTTGGCACTTTCA       | Exon 2-3        |
| Pax3                                                                                       | NM_008781               | AGCTGGGAAATCAGAGACA     | TCCTTTCTAGATCCGCCTC      | Exon 3-4        |
| Pdx1                                                                                       | NM_008814               | CTTTCCCGTGGATGAAATCC    | TTCTTCTCCAGCTCCAG        | Exon 1-2        |
| Pitx2                                                                                      | NM_011098               | AAAGGTCGAGTTCACGGA      | GCCCACATCCTCATTCTT       | Exon 3-4        |
| Pitx3                                                                                      | NM_008852               | CCTCCGCTTCCAGAACAT      | GGCTGGTGAAGTGCGT         | Exon 2-3        |
| Prox1                                                                                      | NM_008937               | CATAAAGTCTGAGTGTGGAGATC | GGTAGCGGGTGTAAGAAGAAC    | Exon 2-3        |
| Six6                                                                                       | NM_011384               | AAACCGCAGACAAAGAGAC     | ACGCCAACACCTCAGGC        |                 |
| <b>Body Pattern</b>                                                                        |                         |                         |                          |                 |
| Hhex                                                                                       | NM_008245               | TTCTCCAACGACCAGACC      | TCGGCGATTCTGAAACCA       | Exon 2-3        |
| Hoxb1                                                                                      | NM_008266               | TTGCTCGTCAGAACCCA       | GTGAAGTTTGTGCGGAGA       | Exon 1-2        |
| Lmx1b                                                                                      | NM_010725               | CTTCCAACAGGGCCTCA       | GGGAGGTATCACTATCAATATCGT | Exon 7-8        |
| <b>Ectoderm Development</b>                                                                |                         |                         |                          |                 |
| Vax2                                                                                       | NM_011912               | CGCTCGGTGAGACAGA        | GGCAAGACAATTTCCCGA       | Exon 1-2        |
| <b>Brain Development</b>                                                                   |                         |                         |                          |                 |
| Alx1,                                                                                      | NM_172553               | TTTACGGCAAAGCGACG       | CTGTCTTCCACTTTGGT        |                 |
| Dlx2,                                                                                      | NM_010054               | ACGACGCTTCCAGAAGA       | GCCGCTTTTCCACATCTT       | Exon 2-3        |
| Dmbx1                                                                                      | NM_130865               | CATGTACAACCTGCACCA      | CGGGCCTCCAAGATGA         | Exon 2-3        |
| Hesx1                                                                                      | NM_010420               | GAGCATTTTAGGACTGGACC    | AGTCTCACTGGGAAGATCTG     |                 |
| Otx2                                                                                       | NM_144841               | CCAGACATCTTCATGAGGGA    | CTCACTTTGTTCTGACCTCC     | Exon 3-4        |
| Six3                                                                                       | NM_011381               | GTTTAAGAACCGGCGACA      | GGACGGTGACTCTGCT         | Exon 1-2        |
| <b>Nervous System Development</b>                                                          |                         |                         |                          |                 |
| Arx                                                                                        | NM_007492               | CTGGGTCTGAGCACTTTT      | GGTGTGGGCTGTCTCA         | Exon 4-5        |
| Dlx5                                                                                       | NM_198854               | GCCAGCCAGCTTTTCAG       | GAAACCAGATTTTACCTGTG     | Exon 2-3        |
| Dlx6                                                                                       | XM_355743               | TCAATACCTGGCCCTTCC      | CACTCTCGTGTGGTTACTA      | exon 4-5        |
| Otp                                                                                        | NM_011021               | GGAACAGCTTTTCGCCCT      | ACACCCAGCCTACACTT        | Exon 1-2        |

|                             |           |                       |                        |            |
|-----------------------------|-----------|-----------------------|------------------------|------------|
| Phox2b                      | NM_008888 | ACTACCCTGACATCTACACC  | CTCCTGCTTGCGAACTT      | xon 2-3    |
| Prop1                       | NM_008936 | AAGCAAACGAAGGGTCATG   | AAAGCTTAGGTCTCCCA      | Exon 1-2   |
| Shox2                       | NM_013665 | GGAGCTGGACATGGGA      | GCCTCTGCTTGATTTTGGTC   | Exon 1-2   |
| <b>Skeletal Development</b> |           |                       |                        |            |
| Alx4                        | NM_007442 | GCGCATCTCTACTTGCAGA   | CTCACCCAGGTTGCTCT      | Exon 2-3   |
| Dlx3                        | NM_010055 | TCGCCAAGTCGGAATAT     | GCTTGCCGTTCCACCAT      | Exon 2-3   |
| Hoxd13                      | NM_008275 | GGTGTACTGTGCCAAGGAT   | TGCAGTTTGGTGTAAAGC     | Exon 1-2   |
| Msx2                        | NM_013601 | CTCGGTCAAGTCGGAAAA    | GGTTGGTCTTGTGTTTCCTC   | Exon 1-2   |
| <b>Muscle Development</b>   |           |                       |                        |            |
| MKX                         | NM_177595 | TGAACGGCTGAGTGTGA     | GCTGAGCTTTCCCCTTTA     | Exon 4-5   |
| SIX1                        | NM_009189 | GTTTAAGAACCGGAGGCA    | TCTGAGCTGGACATGAGC     | Exon 1-2   |
| <b>Heart Development</b>    |           |                       |                        |            |
| ISL1                        | NM_021459 | AGTCATCCGAGTGTGGTT    | CATGGGAGTTCCTGTCATC    | Exon 4-5   |
| <b>development</b>          |           |                       |                        |            |
| Alx3                        | NM_007441 | CCACTTCTACGAGGGCT     | GGGAAGCTTGCACATTAGAG   | Exon 1-2   |
| Barx1                       | NM_007526 | TCGAGAAGCAGAAGTACCTC  | CCACCTTGCAGCACTATT     | Exon 3-4   |
| Cdx4                        | NM_007674 | TTTCTCTTGACTCCGGCA    | GTAGACCACACGATACTTTTCT | Exon 1-2   |
| Cux1                        | NM_009986 | CCCTCAGCATCCAAGAAT    | CCAAAATGGTCTCCCAA      | Exon 21-22 |
| Dlx1                        | NM_010053 | TTGCAGGCTTTGAACCG     | TTGGAGCGTTTGTCTGG      | Exon 2-3   |
| Dlx4                        | NM_007867 | GCAGCTCCAACACCTGAA    | GGAGCGTTTGTCTGAAACC    | Exon 2-3   |
| Emx1                        | NM_010131 | AGCGAGCCTTTGAGAAGA    | CAGCTTCTGCCGTTTGTA     | Exon 2-3   |
| EMX2                        | NM_010132 | GCTACCGATATCTGGGTCA   | GCGTGCTCTAGCCTTAAAAG   | Exon 1-2   |
| En2                         | NM_010134 | CTTGGGTCTACTGCACG     | CCGCTTGTCTCTTTGTT      | Exon 1-2   |
| Hoxa7                       | NM_010455 | AGCCAGTTTCCGCATCTA    | AGGTAGCGGTTGAAATGGA    | Exon 1-2   |
| Hoxa9                       | NM_010456 | CGCCTTCTCCGAAAACAA    | AGCGTCTGGTGTTTTGTG     | Exon 1-2   |
| Hoxb3                       | NM_010458 | ACGTCCAAGCTGAAAAACAG  | GCTCTTGTCCCCTCCC       | Exon 1-2   |
| Hoxb4                       | NM_010459 | GTGCAAAGAGCCCGTC      | GAAACTCCTTCTCCAACCTCC  | Exon 1-2   |
| Hoxb8                       | NM_010461 | GCCCACACAGCTCTTT      | TTGCGAGTCAGATAGGGAT    | Exon 1-2   |
| Hoxb9                       | NM_008270 | AGGAAGCGAGGACAAAGA    | AACTCCTTCTCTAGCTCCAG   | Exon 1-2   |
| Hoxc6                       | NM_010465 | AGATTTACCCCTGGATGCA   | GTTAGGTAGCGGTTGAAGTG   | Exon 1-2   |
| Hoxc8                       | NM_010466 | CACTAACAGTAGCGAAGGAC  | AGTTCCAAGGTCTGATACCG   | Exon 1-2   |
| Hoxc9                       | NM_008272 | GCAAGCACAAAGAGGAGA    | GAAACTCCTTCTCCAGTTCC   | Exon 2-3   |
| Hoxd1                       | NM_010467 | GAGTGGATGAAAGTGAAGAGG | GAAATTTGTGCGGATGGC     | Exon 1-2   |
| Hoxd4                       | NM_010469 | TGGTCTACCCTTGGATGAAG  | ACTTGCTGTCTGGTGTAGG    | Exon 5-6   |
| Hoxd9                       | NM_013555 | GCTGCTCGCTGAAGGA      | CGTCTGGTATTTGGTGTAGG   | Exon 1-2   |
| Isl2                        | NM_027397 | GAACAAGCGTTGCAAGGA    | CGTTCTCATGGCCGATG      | Exon 4-5   |
| Lmx1a                       | NM_033652 | AAAGAGCCCCTGGAGAC     | GCACGCATGACAACTCA      | Exon 2-3   |
| Meis1                       | NM_010789 | GGAAAATGCCTATCGATTTGG | AGTGGATGCCGTGTCAT      | Exon 6-7   |
| Meox1                       | NM_010791 | AGCTGGAGGCAGAGTTT     | CCTTCACACGTTTCCACT     | Exon 2-3   |

|                        |           |                       |                       |          |
|------------------------|-----------|-----------------------|-----------------------|----------|
| Nkx3-1                 | NM_010921 | AGAGCCCGACAAAGCAGG    | CCCCTGGATTATGTTACACAG | Exon 1-2 |
| Otx1                   | NM_011023 | AGGGCAGTAGAAAGGTGATC  | GCGGCTTTTCACCATCTA    | Exon 1-2 |
| Tlx1                   | NM_021901 | CAAGGCGCTCAAATGAC     | CCTCACGTTCCCTGCT      | Exon 2-3 |
| Vax1                   | NM_009501 | TAAATCCAATTCCTCAGCGG  | TGAAGGACGTGCGAGT      | Exon 1-2 |
| Vsx1                   | NM_054068 | GCCACTGCATTCCACT      | GTCCTGCCAACTTGTCTT    | Exon 4-5 |
| <b>differentiation</b> |           |                       |                       |          |
| Hlx                    | NM_008250 | CCTTAAGCTCCAACCCAAGA  | TTGGAAAAGACAGCACGG    | Exon 2-3 |
| Hopx                   | NM_175606 | CTATTTAAGCAGACAGGCACC | AGTTGTACTCCAGGATCTCC  | Exon 1-2 |
