# Supplementary material
Source: PubMed Central journal article supplement (PMC2855359)
Supplement: kfq038_3.pdf [file kfq038_3.pdf]

| <b>Table S3. Primers for real-time PCR amplification of homeobox gene promoters for ChIP analyses.</b> |                  |                         |                          |                           |                 |                 |
|--------------------------------------------------------------------------------------------------------|------------------|-------------------------|--------------------------|---------------------------|-----------------|-----------------|
| <b>Function</b>                                                                                        | <b>Gene name</b> | <b>Accession number</b> | <b>Forward</b>           | <b>Reverse</b>            | <b>PCR size</b> | <b>Location</b> |
|                                                                                                        | Arx              | NM_007492               | AATTTGGCTCTAGTGCGTGCCA   | GCAAAGCGCGAACTGGATTT      | 83              | 1526-1608       |
| <b>Nervous System Development</b>                                                                      | Arx              |                         | AAAGTCAAGGCCGTAGCTGTCT   | ATTGGACCCAACCCTGAGTGAA    | 107             | 572-678         |
| <b>Development</b>                                                                                     | Dlx1             | NM_010053               | AGGAAGGTTGGGAGGGAAAGGA   | TCTGATCAAAGCAGTGCGCGT     | 101             | 1558-1658       |
| <b>Brain Development</b>                                                                               | Dlx2             | NM_010054               | ATGGCGCGCACTAGCACAAATTT  | TGGTGGACAGTGTAGGAGGTTGTT  | 120             | 243-372         |
|                                                                                                        | Dlx4             | NM_007867               | ACCAACAAACTGCCATCGCT     | ACGCTTTGGAGACTCAGAACCT    | 159             | 1251-1409       |
|                                                                                                        | Dlx5             | NM_198854               | ACTGCCATCTAACACTGCTCCT   | TTCTTGCTCCACACCTACCAGT    | 108             | 1052-1160       |
|                                                                                                        | Dlx5             |                         | TGCTGCGTGTCCAAGTGT       | AGGAGCAGTGTAGATGGCAGT     | 127             | 948-1074        |
|                                                                                                        | Dmbx1            | NM_130865               | AGCCAGCAATGACGGAACGATA   | TCTGGAACATCTACGCAGCTCA    | 116             | 1409-1524       |
|                                                                                                        | Emx1             | NM_010131               | TGGCTCAAGAGTGGATTCTGCT   | AACAACAGCACACGCAGGTACA    | 156             | 1427-1582       |
|                                                                                                        | Emx2             | NM_010132               | TTGGCAAAGGGTGTGTGTGT     | TTGGCTCACGCTGAGGCATAAT    | 134             | 638-771         |
|                                                                                                        | Emx2             |                         | AAACTCTTGGGTGCAAGCTGGA   | TCCACGCGTTTGCAGTCTTT      | 112             | 1118-1229       |
|                                                                                                        | Emx2             |                         | AAAGACTGCAAACGCGTGA      | AACCCGCTTCACTCCTACCAAT    | 135             | 1210-1345       |
| <b>Anatomical Structure Morphogenesis</b>                                                              | En1              | NM_010133               | AATGCCCAGAATACAGCAGCGT   | TGGCCGGCTGAAGATTCAACAA    | 142             | 239-380         |
|                                                                                                        | En1              |                         | ATTTATCCGCAAAGTCCCGC     | TTTGCCTTCAAACCGGAAGCAC    | 124             | 1257-1380       |
| <b>Differentiation</b>                                                                                 | Hlx              | NM_008250               | TCTGGTGAGCTGAGAAACCA     | TTCCGCTCTCATGCGACTTT      | 150             | 1078-1227       |
|                                                                                                        | Hlx              |                         | TCAGTACTCAGCTTAGCCAC     | TCATTGGACGTCTTCGTGACCA    | 136             | 1454-1589       |
|                                                                                                        | Hoxa9            | NM_010456               | ACAGAGGCAAGGCCAGATTTGA   | TTATGCAAAGGGATCGCGCA      | 90              | 1391-1483       |
|                                                                                                        | Hoxb2            | NM_134032               | TTTGGAAAGCTGATTGAGGGTGG  | ATCCCAGACACGCTTCATTCT     | 129             | 1219-1347       |
|                                                                                                        | Hoxb3            | NM_010458               | TGCACACCCGTGTGTATTTCCA   | ACACGCAAACGCTGCCCTTAT     | 118             | 532-649         |
|                                                                                                        | Hoxc12           | NM_010463               | TCCTGTGATTCTGTCTGCGT     | TGCACACACTTGCACACACA      | 159             | 113-271         |
|                                                                                                        | Hoxc13           | NM_010464               | AGGAGACCCAGGCTTAGCATCA   | GCATGCGGACACACTTCATT      | 115             | 1532-1646       |
|                                                                                                        | Hoxd1            | NM_010467               | TCGCGTGCCAGCCTTCTAAATA   | TTTGTGGCGACGTGGTGAGAAT    | 156             | 884-1039        |
|                                                                                                        | Hoxd1            |                         | CACCTTTGGCTAAGTTGGCAGCA  | AGCCCGAGGTAATAGTGGCTT     | 143             | 1551-1693       |
|                                                                                                        | Hoxd12           | NM_008274               | TGAGCAGTTTGTGCCGCTTT     | AAAGGCACTTGGCAGCAAGGA     | 107             | 1018-1124       |
| <b>Body Pattern</b>                                                                                    | Hoxd8            | NM_008276               | AGTCTCTGCTGGGCAGATCCA    | ATAAAGCCGCACTGCCAAGG      | 163             |                 |
|                                                                                                        | Hoxd9            | NM_013555               | TGGGCAACTTGTAGAGCGAGGAAT | TGCCATTGTCACTCCCAAA       | 111             | 571-681         |
|                                                                                                        | Hoxd9            |                         | AACCGGTCTCACTGGCCTTTA    | ATGGCCATGGTGCCTCATCTTT    | 96              | 889-984         |
|                                                                                                        | Isl2             | NM_027397               | TCTGTGAGTCTCTGGACAGGAA   | TTGCACACGCTTGCACACAT      | 143             | 1096-1238       |
|                                                                                                        | Lbx1             | NM_010691               | GTGCAAGATTGCAGAAGGAGGT   | GGGAACAATTGGAGGGCTCA      | 125             | 346-470         |
|                                                                                                        | Lmx1b            | NM_010725               | TCCTGCTATTCCAGGACGAA     | AACTAGAAGACGTGCGCATCGGGAA | 80              | 177-256         |
|                                                                                                        | Lmx1b            |                         | CGCTCCTCCTACTCCT         | GCCTGTCACCTGCTTGTGAG      | 83              | 1587-1669       |
|                                                                                                        | Nkx3.1           | NM_010921               | TGTCCTGGAACACTCTGT       | AGTGGTGGCGCATGCCTTTAAT    | 92              | 1087-1178       |
|                                                                                                        | Nkx3.1           |                         | ACTGCCAGCGAGTGTAT        | TCCCAGCTGGACACATCTAGACAA  | 143             | 1176--1318      |
|                                                                                                        | Phox2b           | NM_008888               | AGCTCTTGGAAATTGGATCAGGG  | TTCTAACAGCTCCTGCCCTTT     | 92              | 1279-1370       |
|                                                                                                        | Pitx1            | NM_011097               | AAGTCCCTGGGCCAGTTAACAA   | TCTCCCGATACACTGCTAGGAA    | 165             | 463-627         |

|                            |       |           |                          |                          |     |           |
|----------------------------|-------|-----------|--------------------------|--------------------------|-----|-----------|
| <b>Organ Morphogenesis</b> | Pitx3 | NM_008852 | AAAGCACAGCCCAGGCAAAT     | AGTAACAACGATGCCTCCCT     | 112 | 725-836   |
|                            | Prop1 | NM_008936 | GGCTCTGGTGACCAAGAAGTGATT | ACTTCCCGATGCTGCTCTGTTT   | 128 | 1557-1684 |
|                            | Shox2 | NM_013665 | TTCCGAGGTGCTGCAATGAA     | ATTCCGTTCCCTGCACCCTTT    | 107 | 854-960   |
|                            | Six6  | NM_011384 | AGAACGAGCTTTACCCTGCACT   | AGTACACGTTGTATGCCGGCT    | 120 | 99-218    |
| <b>Muscle Development</b>  | Slx1  | NM_009189 | TGACTTGGTCACCACCCTTT     | TACCGAGTGCTGCCTAGGATAAGA | 116 | 1362-1477 |
|                            | Slx1  |           | ACTGCAAGAGACAGGGCTAA     | AAAGGGTGGTGACCAAGTCAGGA  | 142 | 1240-1381 |
|                            | Vax1  | NM_009501 | ATTCTCAGCCAAACCTCCCA     | TTCCCGGCCCTCATTACAAA     | 107 | 108-214   |
